# Supplementary material for: Mitochondrial DNA enhance innate immune responses in neuromyelitis optica by monocyte recruitment and activation
Source: PubMed Central journal article supplement (PMC7414017; doi:10.1038/s41598-020-70203-x), 2020-08-06
Supplement: 41598_2020_70203_MOESM1_ESM.pdf [file 41598_2020_70203_MOESM1_ESM.pdf]

# Supplementary Information (Supplementary Figure)

**Title; Mitochondrial DNA enhance innate immune responses in neuromyelitis optica by monocyte recruitment and activation**

## Authors

Mikito Shimizu, MD, PhD<sup>1,+</sup>, Tatsusada Okuno, MD, PhD<sup>1,\*,+</sup>, Makoto Kinoshita, MD, PhD<sup>1,+</sup>, Hisae Sumi, MD, PhD<sup>1</sup>, Harutoshi Fujimura, MD, PhD<sup>2</sup>, Kazuya Yamashita, MD, PhD<sup>1</sup>, Tomoyuki Sugimoto, PhD<sup>3</sup>, Shuhei Sakakibara, PhD<sup>4</sup>, Kaori Sakakibara, PhD<sup>1</sup>, Toru Koda, MD, PhD<sup>1</sup>, Satoru Tada, MD, PhD<sup>1</sup>, Teruyuki Ishikura, MD<sup>1</sup>, Hisashi Murata, MD<sup>1</sup>, Shohei Beppu, MD<sup>1</sup>, Naoyuki Shiraishi, MD<sup>1</sup>, Yasuko Sugiyama, MD<sup>1</sup>, Yuji Nakatsuji, MD, PhD<sup>5</sup>, Atsushi Kumanogoh, MD, PhD<sup>6</sup>, Hideki Mochizuki, MD, PhD<sup>1</sup>,

## Affiliation

<sup>1</sup>Department of Neurology, Osaka University Graduate School of Medicine, 2-2, Yamadaoka, Suita, Osaka, 565-0871, Japan

<sup>2</sup>Department of Neurology, Osaka-Toneyama National Medical Center, 5-1-1, Toneyama, Toyonaka, Osaka, 560-8552, Japan

<sup>3</sup>Graduate School of Data Science, Shiga University, 1-1-1, Baba, Hikone, Shiga, 522-8522, Japan

<sup>4</sup>Laboratory of Immune Regulation, Immunology Frontier Research Center, Osaka University, 3-1, Yamadaoka, Suita, Osaka, 565-0871, Japan

<sup>5</sup>Department of Neurology, Faculty of Medicine, University of Toyama, 2630, Sugitani, Toyama, 930-0194, Japan

<sup>6</sup>Department of Respiratory Medicine and Clinical Immunology, Osaka University Graduate School of Medicine, 2-2, Yamadaoka, Suita, Osaka, 565-0871, Japan

\*Correspondence Authors e-mail; [okuno@neuro.med.osaka-u.ac.jp](mailto:okuno@neuro.med.osaka-u.ac.jp),

+these authors contributed equally to this work

## Supplementary Figure S1

Title; FACS analysis of monocyte stimulation to ACM

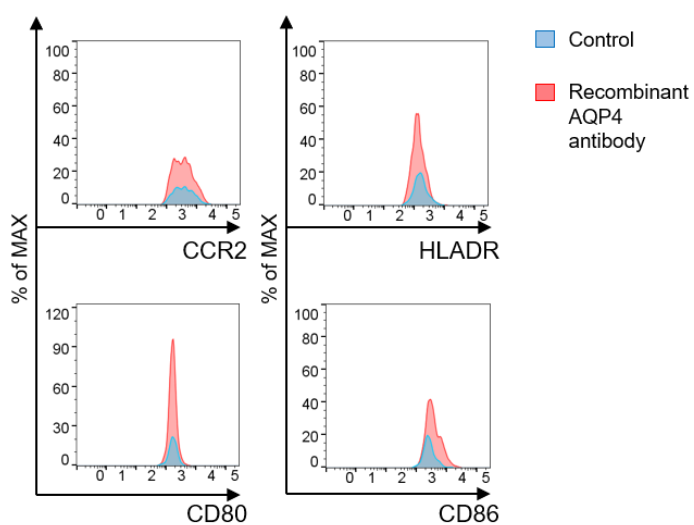

Legend; Monocytes exposed to GK89-treated supernatant of human astrocytes show an enhanced expression level of CD86, but not CCR2, HLADR and CD80.
